# Supplementary material for: Missing the (tipping) point: the effect of information about climate tipping points on public risk perceptions in Norway
Source: Copernicus journal article supplement (doi:10.5194/esd-15-969-2024), 2024-08-02
Supplement: Supplementary file 1 [file esd-15-969-2024-supplement.pdf]

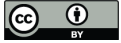

*Supplement of*

## **Missing the (tipping) point: the effect of information about climate tipping points on public risk perceptions in Norway**

**Christina Nadeau et al.**

*Correspondence to:* Christina Nadeau ([christina.nadeau@mn.uio.no](mailto:christina.nadeau@mn.uio.no))

The copyright of individual parts of the supplement might differ from the article licence.

## Survey-Embedded Experimental Treatment (Intervention)

Treatment Condition 1: Text about climate change and climate tipping points (translated from Norwegian)

**Climate scientists warn: If global warming exceeds 1.5 °C, it could trigger more climate tipping points and climate disasters that cannot be undone.**

The global average temperature has already increased by 1.1°C due to man-made emissions of greenhouse gases. As a result, extreme weather phenomena have become more frequent and more intense.

The Earth's climate has been relatively stable since the last ice age (the last 10,000 years), which has made it possible for the entire human civilization to develop under predictable conditions. Without a relatively stable climate, both the natural basis we depend on and our own civilization will change.

Many are already experiencing extreme weather; drought, heat waves and floods. Some of the changes we can expect in Norway are more rain, shorter winters/less snow, more frequent landslides and avalanches, problems with importing food and reduced energy security. As the temperature increases, so does the risk of triggering sudden and dramatic "tipping points" in the climate.

A "tipping point" refers to critical thresholds in a system where the system quickly moves into a new state where the development cannot be reversed. Scientists warn that the Earth's climate is now moving towards an unstable state where the risk of such tipping points increases. Since different parts of the climate system are interconnected, triggering one tipping point will increase the likelihood that other tipping points will also be triggered.

Researchers have identified several such tipping points. Some examples of such tipping points are an irreversible meltdown (i.e. a meltdown that cannot be reversed) of the Greenland ice sheet and the Antarctic ice sheet, which will cause the sea level to rise, and the Amazon to "tip over" from rainforest to savannah with large emissions of CO<sub>2</sub> and loss of irreplaceable biodiversity. In our immediate areas, a weakening and possible collapse of the Gulf Stream can suddenly produce a much colder climate. If we do not act now and limit the global average temperature, scientists warn that many of these tipping points could be reached. Our choices in the next 5-10 years will have a major impact on whether we and future generations avoid the consequences of the most threatening tipping points.

As of today, a temperature rise of 1.5 °C is expected during the 2030s, but further into the future is uncertain.

**Climate scientists warn: If global warming exceeds 1.5 °C, it will have dramatic consequences.**

The global average temperature has already increased by 1.1°C due to man-made emissions of greenhouse gasses. As a result, extreme weather phenomena have become more frequent and more intense.

The Earth's climate has been relatively stable since the last ice age (the last 10,000 years), which has made it possible for the entire human civilization to develop under predictable conditions. Without a relatively stable climate, both the natural basis we depend on, and our own civilization will change.

Some are already experiencing droughts, heat waves and floods. Some of the changes we can expect in Norway are more rain, shorter winters/less snow, more frequent landslides and avalanches, problems with importing food and reduced energy security.

Scientists warn that rising global average temperatures are putting the Earth under increasing pressure. Further temperature increases make it more likely that ecosystems and living conditions will change in the most vulnerable areas, and as climate change accelerates, such changes will affect the entire planet.

Scientists have identified several places that are particularly vulnerable to climate change. Examples of this are the melting of the Greenland ice sheet and the ice sheet in Antarctica, which will cause the sea level to rise. Loss of rainforests such as the Amazon, loss of coral reefs and weakening of ocean currents such as the Gulf Stream are also examples of such "risk areas". If we don't act now and limit the global average temperature, scientists warn that many of these changes will become likely. As of today, a temperature rise of 1.5 °C is expected during the 2030s. So the choices over the next 5-10 years will have great significance both for our own future and for future generations.

Table S1: Survey questions and results for online survey participants per group.

| <b>Are you a man or a woman?</b>      |              |                            |                     |
|---------------------------------------|--------------|----------------------------|---------------------|
|                                       |              | <b>Audience</b>            |                     |
|                                       | <b>TOTAL</b> | <b>Text tipping points</b> | <b>Text climate</b> |
| BASE                                  | 851          | 424                        | 427                 |
| Man                                   | 50%          | 51%                        | 49%                 |
| Woman                                 | 50%          | 49%                        | 51%                 |
| <b>TOTAL</b>                          | <b>100%</b>  | <b>100%</b>                | <b>100%</b>         |
| <b>Age groups</b>                     |              |                            |                     |
|                                       |              | <b>Audience</b>            |                     |
|                                       | <b>TOTAL</b> | <b>Text tipping points</b> | <b>Text climate</b> |
| BASE                                  | 851          | 424                        | 427                 |
| Under 30 years                        | 19%          | 19%                        | 19%                 |
| 30–39 years                           | 17%          | 16%                        | 19%                 |
| 40–49 years                           | 17%          | 17%                        | 16%                 |
| 50–59 years                           | 17%          | 18%                        | 16%                 |
| 60 years +                            | 30%          | 30%                        | 31%                 |
| <b>TOTAL</b>                          | <b>100%</b>  | <b>100%</b>                | <b>100%</b>         |
| <b>Participant National Locations</b> |              |                            |                     |
|                                       |              | <b>Audience</b>            |                     |
|                                       | <b>TOTAL</b> | <b>Text tipping points</b> | <b>Text climate</b> |
| BASE                                  | 851          | 424                        | 427                 |
| Northern Norway                       | 9%           | 8%                         | 10%                 |
| Central Norway                        | 14%          | 15%                        | 13%                 |
| Westland                              | 20%          | 21%                        | 19%                 |
| Eastern Norway                        | 30%          | 28%                        | 32%                 |
| Southern Norway                       | 14%          | 14%                        | 13%                 |
| Oslo                                  | 13%          | 13%                        | 13%                 |
| <b>TOTAL</b>                          | <b>100%</b>  | <b>100%</b>                | <b>100%</b>         |
| <b>q1r1</b>                           |              |                            |                     |

**How much do you agree or disagree with the following statements? - The climate crisis is a serious problem**

|                     | TOTAL | Audience            |              |
|---------------------|-------|---------------------|--------------|
|                     |       | Text tipping points | Text climate |
| BASE                | 851   | 424                 | 427          |
| Completely agree    | 47%   | 48%                 | 46%          |
| Quite agree         | 31%   | 29%                 | 33%          |
| Neither             | 12%   | 14%                 | 11%          |
| Quite disagree      | 4%    | 3%                  | 5%           |
| Completely disagree | 5%    | 6%                  | 5%           |
| Do not know         | 1%    | 0%                  | 1%           |
| TOTAL               | 100%  | 100%                | 100%         |

**q1r2**

**How much do you agree or disagree with the following statements? - I am personally concerned about the climate crisis**

|                     | TOTAL | Audience            |              |
|---------------------|-------|---------------------|--------------|
|                     |       | Text tipping points | Text climate |
| BASE                | 851   | 424                 | 427          |
| Completely agree    | 21%   | 23%                 | 19%          |
| Quite agree         | 37%   | 36%                 | 37%          |
| Neither             | 23%   | 22%                 | 24%          |
| Quite disagree      | 8%    | 8%                  | 9%           |
| Completely disagree | 10%   | 11%                 | 9%           |
| Do not know         | 1%    | 1%                  | 1%           |
| TOTAL               | 100%  | 100%                | 100%         |

**q1r3**

**How much do you agree or disagree with the following statements? - We must act quickly to prevent the most serious consequences of the climate crisis**

|                     | TOTAL | Audience            |              |
|---------------------|-------|---------------------|--------------|
|                     |       | Text tipping points | Text climate |
| BASE                | 851   | 424                 | 427          |
| Completely agree    | 39%   | 39%                 | 39%          |
| Quite agree         | 32%   | 33%                 | 31%          |
| Neither             | 15%   | 15%                 | 14%          |
| Quite disagree      | 4%    | 3%                  | 6%           |
| Completely disagree | 8%    | 8%                  | 8%           |
| Do not know         | 2%    | 2%                  | 3%           |
| TOTAL               | 100%  | 100%                | 100%         |

**Q3a**

To what extent do you know the term "tipping points in the climate system"?

|                          | TOTAL | Audience            |              |
|--------------------------|-------|---------------------|--------------|
|                          |       | Text tipping points | Text climate |
| BASE                     | 851   | 424                 | 427          |
| Know it well             | 7%    | 8%                  | 6%           |
| Know a little about it   | 21%   | 21%                 | 22%          |
| Neutral                  | 16%   | 17%                 | 15%          |
| Don't know much about it | 23%   | 22%                 | 23%          |
| Never heard of it        | 28%   | 27%                 | 28%          |
| Not sure/don't know      | 6%    | 5%                  | 7%           |
| TOTAL                    | 100%  | 100%                | 100%         |

**Q3b**

Can you give an example of a tipping point in the climate system?

|       | TOTAL | Audience            |              |
|-------|-------|---------------------|--------------|
|       |       | Text tipping points | Text climate |
| BASE  | 372   | 192                 | 180          |
| Yes   | 44%   | 41%                 | 46%          |
| No    | 56%   | 59%                 | 54%          |
| TOTAL | 100%  | 100%                | 100%         |

**Assigned Participants to  
Intervention Text**

|                     | TOTAL | Audience            |              |
|---------------------|-------|---------------------|--------------|
|                     |       | Text tipping points | Text climate |
| BASE                | 851   | 424                 | 427          |
| Text tipping points | 50%   | 100%                |              |
| Text climate        | 50%   |                     | 100%         |
| TOTAL               | 100%  | 100%                | 100%         |

**Q4r1**

After reading the information, how much do you agree or disagree with the following statements? - This information is new to me

|                     | TOTAL | Audience            |              |
|---------------------|-------|---------------------|--------------|
|                     |       | Text tipping points | Text climate |
| BASE                | 851   | 424                 | 427          |
| Completely agree    | 5%    | 7%                  | 3%           |
| Quite agree         | 17%   | 20%                 | 14%          |
| Neither             | 21%   | 24%                 | 18%          |
| Quite disagree      | 27%   | 28%                 | 26%          |
| Completely disagree | 29%   | 21%                 | 36%          |
| Do not know         | 1%    | 0%                  | 2%           |
| TOTAL               | 100%  | 100%                | 100%         |

**Q5r1**

How much do you agree or disagree with the following statements? - The climate crisis is a serious problem

|                     | TOTAL | Audience            |              |
|---------------------|-------|---------------------|--------------|
|                     |       | Text tipping points | Text climate |
| BASE                | 851   | 424                 | 427          |
| Completely agree    | 49%   | 51%                 | 47%          |
| Quite agree         | 30%   | 29%                 | 31%          |
| Neither             | 10%   | 10%                 | 11%          |
| Quite disagree      | 3%    | 2%                  | 3%           |
| Completely disagree | 6%    | 6%                  | 5%           |
| Do not know         | 2%    | 2%                  | 2%           |
| TOTAL               | 100%  | 100%                | 100%         |

**Q5r2**

How much do you agree or disagree with the following statements? - I am personally concerned about the climate crisis

|                     | TOTAL | Audience            |              |
|---------------------|-------|---------------------|--------------|
|                     |       | Text tipping points | Text climate |
| BASE                | 851   | 424                 | 427          |
| Completely agree    | 28%   | 32%                 | 25%          |
| Quite agree         | 30%   | 29%                 | 30%          |
| Neither             | 22%   | 21%                 | 22%          |
| Quite disagree      | 9%    | 7%                  | 10%          |
| Completely disagree | 10%   | 11%                 | 10%          |

|              |             |             |             |
|--------------|-------------|-------------|-------------|
| Do not know  | 1%          | 1%          | 2%          |
| <b>TOTAL</b> | <b>100%</b> | <b>100%</b> | <b>100%</b> |

**Q5r3**

**How much do you agree or disagree with the following statements? - We must act quickly to avoid the most serious consequences of the climate crisis**

|                     | <b>TOTAL</b> | <b>Audience</b>            |                     |
|---------------------|--------------|----------------------------|---------------------|
|                     |              | <b>Text tipping points</b> | <b>Text climate</b> |
| <b>BASE</b>         | <b>851</b>   | <b>424</b>                 | <b>427</b>          |
| Completely agree    | 44%          | 44%                        | 44%                 |
| Quite agree         | 31%          | 30%                        | 31%                 |
| Neither             | 13%          | 13%                        | 12%                 |
| Quite disagree      | 4%           | 4%                         | 5%                  |
| Completely disagree | 6%           | 6%                         | 5%                  |
| Do not know         | 3%           | 2%                         | 3%                  |
| <b>TOTAL</b>        | <b>100%</b>  | <b>100%</b>                | <b>100%</b>         |



Table S2. Level of Knowledge on CTPs Amongst Participants

| <b>Category #</b> | <b>Category</b>               | <b>Description</b>                                                                                                                                                                                                                                   | <b>Count</b> |
|-------------------|-------------------------------|------------------------------------------------------------------------------------------------------------------------------------------------------------------------------------------------------------------------------------------------------|--------------|
| 1                 | No knowledge                  | Self-reported lack or limitation of familiarity with climate tipping points.                                                                                                                                                                         | 440          |
| 2a                | Some knowledge                | Self-reported familiarity with climate tipping points, but answered NO to the question about ability to provide an example OR answered YES to question about ability to provide an example, but did not respond to the prompt to provide an example. | 209          |
| 2b                | Some knowledge, but incorrect | self-reported familiarity and ability to provide an example, but inability to provide a correct example of a tipping point or any description (feature) that could be associated with climate tipping points.                                        | 44           |
| 4                 | Good knowledge                | Identified one or more correct examples or at least one correct feature of climate tipping processes.                                                                                                                                                | 109          |

Table S3. Characteristics of Climate Tipping Points

| <b>Theme</b>                         | <b>Code</b>   | <b>Example (from Dataset)</b> | <b>Count</b> |
|--------------------------------------|---------------|-------------------------------|--------------|
| Abruptness/non-linearity             | CTP_Abrupt    |                               | 8            |
| Critical Threshold                   | CTH           |                               | 13           |
| Irreversibility ; Point of no return | CTP_Irrevers  |                               | 46           |
| Feedbacks ; System                   | CTP_Feedbk    |                               | 18           |
| Uncertainty                          | CTP_Uncerty   |                               | 1            |
| Severe Impacts ; Collapse            | CTP_Severe    |                               | 3            |
| Multiple stable states               | CTP_Multistbl |                               | 4            |

Table S4. Climate Tipping Element Examples Identified

| <b>CTP Theme</b>                | <b>Code</b> | <b>Example</b> | <b>Count</b> |
|---------------------------------|-------------|----------------|--------------|
| Cryosphere components (general) | Cryos       |                | 34           |
| Pole Ice                        | P_Cryos     |                | 9            |
| Greenland Ice Sheet             | Greenland   |                | 8            |
| Arctic Sea Ice                  | Arcticice   |                | 7            |
| Antarctica                      | Antarctic   |                | 0            |
| Permafrost                      | Permfrost   |                | 13           |
| Mountain Glaciers               | Mountglac   |                | 0            |
| Circulation Patters (general)   | Circ_gen    |                | 0            |
| Ocean Circulation               | Ocean_circ  |                | 6            |
| Atmosphere Circulation          | Atmos_circ  |                | 1            |
| Biosphere Components (General)  | Bios_com    |                | 0            |
| Amazon Rainforest Dieback       | Amazon      |                | 3            |
| Coral Reefs                     | Coralr      |                | 1            |
| Boreal Forests                  | Boreal      |                | 0            |
| West African Monsoon            | WAM         |                | 0            |
| Indian Summer Monsoon           | ISM         |                | 0            |

Table S5. Other Impacts Identified in Open Ended Responses

| <b>Impacts</b>      | <b>Code</b> | <b>Example</b> | <b>Count</b> |
|---------------------|-------------|----------------|--------------|
| Sea Level Rise      | SLR         |                | 7            |
| Deforestation       | DF          |                | 1            |
| Extreme Weather     | XW          |                | 3            |
| Ocean Acidification | OH          |                | 2            |
| Species Extinction  | SE          |                | 9            |

Table S6. Open Ended Answer Data

| <b>c</b> | <b>q4boe</b>                                                                                                                                            | <b>Codes</b>                                        | <b>Category</b> |
|----------|---------------------------------------------------------------------------------------------------------------------------------------------------------|-----------------------------------------------------|-----------------|
| 1.       | Too late, too late to reduce CO2                                                                                                                        | CTP_Irrevers ; TL                                   | 3               |
| 2.       | The changes have gone so far that it cannot be healed                                                                                                   | CTP_Irrevers                                        | 3               |
| 3.       | Where it has been good so far that there is no going back.                                                                                              | CTP_Irrevers                                        | 3               |
| 4.       | Melting of glaciers and polar regions.                                                                                                                  | Cryos ; P_Cryos                                     | 3               |
| 5.       | Climate changes from stable to unstable (difficult to predict, more climate stress such as rain, wind, etc.)                                            | CTP_Multistbl ;<br>CTP_Uncerty ;<br>CTP_Severe ; XW | 3               |
| 6.       | When global deforestation reaches a level where green plants have too little capacity to absorb the necessary CO2.                                      | CTP_Feedbk ;<br>HDF                                 | 3               |
| 7.       | Global warming                                                                                                                                          |                                                     | 2b              |
| 8.       | The Greenland ice sheet is melting                                                                                                                      | Greenland                                           | 3               |
| 9.       | When it is too late to do something that can stop the climate crisis                                                                                    | CTP_Irrevers ; TL                                   | 3               |
| 10.      | The co2 level has become so high that we cannot reduce it                                                                                               | CTP Irrevers ;<br>COC                               | 3               |
| 11.      | Melting of tundra resulting in large emissions of stored co2                                                                                            | CTP_Feedbk ;<br>Permfrost                           | 3               |
| 12.      | Expected upcoming temperature rise beyond what the experts have set as a goal so that it will not be possible to reverse further temperature rise later | CTP_Irrevers ;<br>Temp                              | 3               |
| 13.      | That the atmosphere has become so polluted that the natural purification processes are unable to correct it.                                            | CTP Irrevers ;<br>Pollut                            | 3               |
| 14.      | As it is too late to turn around. If the Gulf Stream slows down, we will not be able to prevent it.                                                     | CTP_Irrevers ;<br>Ocean_circ ; TL                   | 3               |
| 15.      | When the permafrost thaws                                                                                                                               | Permfrost                                           | 3               |
| 16.      | Floods, drought etc                                                                                                                                     | XW                                                  | 2b              |
| 17.      | Temperature rise. Increase in the oceans climate destroys crops                                                                                         | SLR                                                 | 2b              |
| 18.      | The ice disappears, seas and land absorb more sunlight                                                                                                  | Cryos ;<br>CTP_Feedbk                               | 3               |

|     |                                                                                                                                                                                                       |                                                   |    |
|-----|-------------------------------------------------------------------------------------------------------------------------------------------------------------------------------------------------------|---------------------------------------------------|----|
| 19. | Melting of the permafrost. Melting of ice.                                                                                                                                                            | Cryos ; Permfrost                                 | 3  |
| 20. | If the polis in the north melts, the Black Sea will absorb more radiation from the sun and prevent the formation of new polis                                                                         | CTP_Feedbk ;<br>P_Cryos                           | 3  |
| 21. | Temperature rise                                                                                                                                                                                      |                                                   | 2b |
| 22. | When it is too late, e.g. that the glaciers in the Arctic have melted                                                                                                                                 | CTP_Irrevers ;<br>Arcticice                       | 3  |
| 23. | Ice is melting at sea and on land                                                                                                                                                                     | Cryos                                             | 3  |
| 24. | When almost all the ice in the northern regions has melted.                                                                                                                                           | Cryos                                             | 3  |
| 25. | Arctic and Antarctic, the temperature rise in air and water melts the ice caps, eventually causing accelerating effects in global climate. At the tipping point, the process can become irreversible. | Cryos ; P_Cryos ;<br>CTP_Abrupt ;<br>CTP_Irrevers | 3  |
| 26. | When it is too late to reverse a process                                                                                                                                                              | CTP_Irrevers ; TL                                 | 3  |
| 27. | Npr the development has reached an "irreversible point"                                                                                                                                               | CTP_Irrevers                                      | 3  |
| 28. | The ice sheet in Greenland                                                                                                                                                                            | Greenland                                         | 3  |
| 29. | Methane from thawed permafrost.                                                                                                                                                                       | Permfrost ;<br>CTP_Feedbk                         | 3  |
| 30. | Temperature                                                                                                                                                                                           |                                                   | 2b |
| 31. | When it is too late to do something about a certain thing                                                                                                                                             | CTP_Irrevers ; TL                                 | 3  |
| 32. | Melting of glaciers/polar ice                                                                                                                                                                         | Cryos ; P_Cryos                                   | 3  |
| 33. | When the Gulf Stream turns                                                                                                                                                                            | Ocean_circ                                        | 3  |
| 34. | Ice melting that cannot be reversed                                                                                                                                                                   | Cryos ;<br>CTP_Irrevers                           | 3  |
| 35. | rise in temperature on average per year                                                                                                                                                               |                                                   | 2b |
| 36. | Extinction of animal species                                                                                                                                                                          | SE                                                | 2b |
| 37. | Temperature rise over 2 degrees Sea level rise over 1 m due to ice melting                                                                                                                            | Temp ; Cryos ; SL                                 | 3  |
| 38. | When the temperature increases by more than 1.5 degrees globally, dramatic changes will occur                                                                                                         | Temp ;<br>CTP_Severe                              | 3  |
| 39. | 2 degree warming within a certain time                                                                                                                                                                | Temp ; Time                                       | 2b |
| 40. | The permafrost melts and releases more methane, which causes the temperature to rise and more permafrost to melt, etc. (Occurs at a temp. threshold)                                                  | Permfrost ;<br>CTP_Feedbk ;<br>Temp ; CTH         | 3  |
| 41. | Temperature rise above a point.                                                                                                                                                                       | Temp                                              | 2b |

|     |                                                                                                                                                                                                                                     |                                           |    |
|-----|-------------------------------------------------------------------------------------------------------------------------------------------------------------------------------------------------------------------------------------|-------------------------------------------|----|
| 42. | Electric cars JOKE                                                                                                                                                                                                                  | ST                                        | 2b |
| 43. | Thawing permafrost.                                                                                                                                                                                                                 | Perm frost                                | 3  |
| 44. | sea ice e.g. in Artis is disappearing. Permafrost is thawing. The rainy season changes around Equat5. Drought in, for example, Europe this year, etc.                                                                               | Arcticice ; Perm frost ; XW               | 3  |
| 45. | The ice sheet in Greenland                                                                                                                                                                                                          | Greenland                                 | 3  |
| 46. | There will soon be more plastic than fish in the ocean                                                                                                                                                                              | Pollut                                    | 2b |
| 47. | The ice sheet near Greenland                                                                                                                                                                                                        | Greenland                                 | 3  |
| 48. | When climate change reaches the point where it is irreversible..                                                                                                                                                                    | CTP Irrevers ; CTH                        | 3  |
| 49. | We are approaching a point where so much of the ice at the poles and glaciers has melted that it will affect the process to go even faster (bare soil and water increase the temperature so the ice melts even faster).             | Cryos ; P_Cryos ; CTP_Abrupt ; CTP_Feedbk | 3  |
| 50. | I think. When a glacier disappears. Or am I Completely in the wrong place?                                                                                                                                                          | Cryos                                     | 3  |
| 51. | When so much of the rainforest has been cut down that it will not be able to rebuild itself.                                                                                                                                        | HDF                                       | 2b |
| 52. | An event that happens and cannot be undone.                                                                                                                                                                                         | CTP Irrevers                              | 3  |
| 53. | It is too late to do anything. It leads, among other things, to faster extinction of species, which are already suffering due to the nature crisis.                                                                                 | CTP Irrevers ; TL ; CTP_Abrupt ; SE       | 3  |
| 54. | For example when the permafrost in Siberia disappears, large amounts of CO2 are released.                                                                                                                                           | Perm frost ; CTP_Feedbk                   | 3  |
| 55. | Like when Al Gore said in 2007 that the North Pole could melt in 7 years. And we were already too late to change the climate (as if humans have ever had an impact on the climate...). As far as I know there is still ice there... | Cryos ; Time ; TL; CTP_Irrevers           | 3  |
| 56. | If we go over 1.5 or 2 degrees warming                                                                                                                                                                                              | Temp                                      | 2b |
| 57. | Number of degrees in the sea                                                                                                                                                                                                        | Temp                                      | 2b |
| 58. | Ice melting continues even if the temperature drops                                                                                                                                                                                 | CTP Irrevers ; Cryos                      | 3  |
| 59. | Increase in temperature in the sea a dying Oslo-fjord                                                                                                                                                                               | Temp                                      | 2b |

|     |                                                                                                                                                                                                  |                                                          |    |
|-----|--------------------------------------------------------------------------------------------------------------------------------------------------------------------------------------------------|----------------------------------------------------------|----|
| 60. | The amount of CO2 in the atmosphere rises more than the amount that is reduced by nature                                                                                                         | CTP_Feedbk ;<br>COC                                      | 3  |
| 61. | Ice melting                                                                                                                                                                                      | Cryos                                                    | 3  |
| 62. | Desertification in Spain                                                                                                                                                                         | XW                                                       | 2b |
| 63. | Melted tundra releases greenhouse gases                                                                                                                                                          | Permfrost ;<br>CTP_Feedbk                                | 3  |
| 64. | 1,5 degrees                                                                                                                                                                                      | Temp                                                     | 2b |
| 65. | Melting of ice in the Arctic and Grønland.<br>Deforestation of rainforest                                                                                                                        | Arcticice ; Grnland<br>; Amzon                           | 3  |
| 66. | The time when the environment is not reversible                                                                                                                                                  | CTP_Irrevers ;<br>Time                                   | 3  |
| 67. | Point of no return                                                                                                                                                                               | CTP_Irrevers ;                                           | 3  |
| 68. | One tipping point is where climate bluffers, so-called scientists, predict that it is too late to turn around. This point moves in step with all the predictions that fail.                      | CTP_Irrevers ; TL                                        | 3  |
| 69. | Since there is no going back..                                                                                                                                                                   | CTP_Irrevers                                             | 3  |
| 70. | The sea ice and glaciers are disappearing                                                                                                                                                        | Cryos ; Arcticice                                        | 3  |
| 71. | global temperature                                                                                                                                                                               |                                                          | 2b |
| 72. | The 1.5 degree target                                                                                                                                                                            | Temp                                                     | 2b |
| 73. | When the average degree is above a certain point                                                                                                                                                 | Temp                                                     | 2b |
| 74. | When the melting of the Poles makes us lose the reflection of radiation and rather the warming of the sea with increased evaporation and increased warming of the atmosphere.....                | P_Cryos ;<br>CTP_Feedbk                                  | 3  |
| 75. | Extinct species. Glacier melting. Sea level rise.                                                                                                                                                | SE ; Cryos; SLR                                          | 3  |
| 76. | A tipping point in the Earth's climate system is a mechanism that causes the climate to change from one stable state to another, if certain threshold values are exceeded during climate change. | CTP_Multistbl ;<br>CTH ;<br>CTP_Irrevers ;<br>CTP_Feedbk | 3  |
| 77. | When the Earth's climate systems change. Which in turn affects sea animals, plants and people.                                                                                                   | CTP_Multistbl ;<br>CTP_Feedbk                            | 3  |
| 78. | That if the average temperature exceeds 2% from today's level, it will be almost impossible to return                                                                                            | CT_Irrevers :<br>Temp                                    | 3  |
| 79. | 2 degree heating                                                                                                                                                                                 | Temp                                                     | 2b |

|      |                                                                                                                                                                                            |                                        |    |
|------|--------------------------------------------------------------------------------------------------------------------------------------------------------------------------------------------|----------------------------------------|----|
| 80.  | increase in greenhouse gas emissions                                                                                                                                                       |                                        | 2b |
| 81.  | Temperatures fluctuate frequently and with greater and greater variations                                                                                                                  | CTP_Abrupt ;<br>CTP_Multistbl          | 3  |
| 82.  | The point at which it is not possible to reverse or stop global warming above a given limit.                                                                                               | CTH ;<br>CTP_Irrevers                  | 3  |
| 83.  | When the temperature of the globe reaches a certain level, we are at the point of no return                                                                                                | Temp; CTH                              | 3  |
| 84.  | Ice melting in the arctic                                                                                                                                                                  | Arcticice                              | 3  |
| 85.  | Melting of the Permafrost                                                                                                                                                                  | Perm frost                             | 3  |
| 86.  | Issmelting                                                                                                                                                                                 | Cryos                                  | 3  |
| 87.  | Melting in the Arctic Ocean                                                                                                                                                                | P_Cryos                                | 3  |
| 88.  | Increasing CO2 and methane concentration in the atmosphere has an accelerating and irreversible effect that leads to temperature rise and more extreme weather, extinction of species etc. | CTP_Abrupt ; CTP<br>Irrevers ; XW ; SE | 3  |
| 89.  | that it gets warm enough to permafrost tentin                                                                                                                                              | Perm frost                             | 3  |
| 90.  | The tipping point is when you can no longer stop something, but rather it escalates.                                                                                                       | CTP_Abrupt ;<br>CTH                    | 3  |
| 91.  | When the average temperature is increased by 2 degrees Celsius                                                                                                                             | Temp                                   | 2b |
| 92.  | When the sea ice disappears                                                                                                                                                                | Arcticice                              | 3  |
| 93.  | When one passes a certain increase in temperature                                                                                                                                          | Temp                                   | 2b |
| 94.  | Destruction of rainforests                                                                                                                                                                 | Amazon                                 | 2b |
| 95.  | Species are dying out at a rapid rate which can lead to the collapse of the ecosystem                                                                                                      | SE ;                                   | 2b |
| 96.  | Temperature rise, causes the ice to melt down which leads to changes in ocean currents etc                                                                                                 | Cryos ; Ocean_circ                     | 3  |
| 97.  | When the polar ice melts beyond a certain extent, this development cannot be reversed                                                                                                      | P_Cryos :<br>CTP_Irrevers              | 3  |
| 98.  | Melting of glaciers                                                                                                                                                                        | Cryos                                  | 3  |
| 99.  | No                                                                                                                                                                                         |                                        | 2a |
| 100. | Global warming rises more than what is the maximum for what nature can withstand                                                                                                           | CTH                                    | 3  |
| 101. | Ocean temperature                                                                                                                                                                          |                                        | 2b |
| 102. | Once certain things have been exceeded there is no turning back                                                                                                                            | CTP_Irrevers ;<br>CTH                  | 3  |

|      |                                                                                                                                                                                                                                                                                                   |                                             |    |
|------|---------------------------------------------------------------------------------------------------------------------------------------------------------------------------------------------------------------------------------------------------------------------------------------------------|---------------------------------------------|----|
| 103. | F                                                                                                                                                                                                                                                                                                 |                                             | 2a |
| 104. | Melting of the ice                                                                                                                                                                                                                                                                                | Cryos                                       | 3  |
| 105. | When the temperature has increased so much that the melting of the ice cannot be stopped and the sea is affected, certain species become extinct and land areas are put under water.                                                                                                              | Cryos ;<br>CTP_Irrevers ; SE<br>; SLR       | 3  |
| 106. | Isbresmelting                                                                                                                                                                                                                                                                                     | Cryos                                       | 3  |
| 107. | The ice sheet in Greenland, e.g                                                                                                                                                                                                                                                                   | Greenland                                   | 3  |
| 108. | Average temperature increase of certain degrees                                                                                                                                                                                                                                                   | Temp                                        | 2b |
| 109. | I'll tell you when it's me, and it's when the MAGNETIC NORTH POLE has moved over to Siberia - that's where the strongest geomagnetic field is. Early in 2023 we will see if changes happen quickly or slowly, it depends on whether the magnetic pole accelerates or continues at the same speed. |                                             | 2b |
| 110. | When the ocean has buffered so much CO2 that it is too acidic and cannot absorb any more                                                                                                                                                                                                          | OH                                          | 2b |
| 111. | Gets over a threshold value that cannot be reversed.                                                                                                                                                                                                                                              | CTP_Irrevers ;<br>CTH                       | 3  |
| 112. | If a glacier is melting and continues to melt/disappear even as it gets colder, it has passed a tipping point.                                                                                                                                                                                    | Cryos ;<br>CTP_Irrevers                     | 3  |
| 113. | Smeltibg                                                                                                                                                                                                                                                                                          | Cryos                                       | 3  |
| 114. | When the sea ice level becomes so low that warming accelerates.                                                                                                                                                                                                                                   | Cryos ;<br>CTP_Abrupt                       | 3  |
| 115. | That if you fail to limit emissions to a given level within a given time, there is no going back.                                                                                                                                                                                                 | CTP_Irrevers ;<br>Temp ; Time               | 3  |
| 116. | The ocean is saturated with CO2, which causes more to remain in the atmosphere                                                                                                                                                                                                                    | OH                                          | 2b |
| 117. | When big/abrupt changes happen immediately, if only that the changes happen in such a way that there is nothing to do with the changes and that it is irreversible.                                                                                                                               | CTP_Abrupt ;<br>CTP_Irrevers;<br>CTP_Severe | 3  |



|      |                                                                                                                                           |                             |    |
|------|-------------------------------------------------------------------------------------------------------------------------------------------|-----------------------------|----|
| 118. | Bleaching and acidification of coral reefs                                                                                                | Pollut ; Coralr             | 3  |
| 119. | Big change compared to the norm                                                                                                           |                             | 2b |
| 120. | Animal species are disappearing                                                                                                           | SE                          | 2b |
| 121. | When climate change has progressed so far that it is not possible to reverse.                                                             | CTP_Irrevers                | 3  |
| 122. | Water rise, ice melting                                                                                                                   | Cryos ; SLR                 | 3  |
| 123. | The point where the temperature change is so great that, according to some researchers, you cannot turn around to avoid the consequences. | CTH ; Temp;<br>CTP_Irrevers | 3  |
| 124. | A time when not enough has been done to stop the progress of global warming, and nothing can be done to reverse what is going to happen   | Time ;<br>CTP_Irrevers      | 3  |
| 125. | ikea                                                                                                                                      |                             | 2a |
| 126. | Ice melting in self-reinforcing loop                                                                                                      | Cryos ;<br>CTP_Feedbk       | 3  |
| 127. | Acid levels and/or temperatures in ports. Increases above x concentration or degree, then it becomes much more difficult to turn back.    | Temp ;<br>CTP_Irrevers      | 3  |
| 128. | When the glaciers in Greenland melt                                                                                                       | Greenland                   | 3  |
| 129. | That you get to a point where a consequence of the changes has an impact on other systems, and it cannot be taken in again.               | CTH ;<br>CTP_Feedbk         | 3  |
| 130. | The ice cap is melting                                                                                                                    | Cryos                       | 3  |
| 131. | CO 2 concentration in the air                                                                                                             |                             | 2b |
| 132. | When the policy that melts no longer refreezes. When something stops behaving as it previously did.                                       | Cryos ;<br>CTP_Irrevers     | 3  |
| 133. | .                                                                                                                                         |                             | 2a |
| 134. | The deforestation                                                                                                                         | DF                          | 2b |
| 135. | IN                                                                                                                                        |                             | 2a |

|      |                                                                                                                                                                                                                                                                                                               |                                                  |    |
|------|---------------------------------------------------------------------------------------------------------------------------------------------------------------------------------------------------------------------------------------------------------------------------------------------------------------|--------------------------------------------------|----|
| 136. | For example, when the temperature rises so that it destabilises water flows so that they cannot return if the temperature drops again.                                                                                                                                                                        | CTP_Irrevers ;<br>Ocean_circ                     | 3  |
| 137. | Permafrost is thawing. Polis/glaciers are not coming back. The ocean does not absorb more CO2. Loss of biodiversity, which cannot be recovered                                                                                                                                                                | Permfrost ; Cryos;<br>CTP_Irrevers : SE          | 3  |
| 138. | Temperatures                                                                                                                                                                                                                                                                                                  |                                                  | 2b |
| 139. | A tipping point will be when we reach a certain concentration of co2 in the atmosphere that affects species, potentially exterminating them.                                                                                                                                                                  | COC; SE                                          | 2b |
| 140. | The temperature in the sea rises so much that all the sea ice melts, e.g                                                                                                                                                                                                                                      | Arcticice                                        | 3  |
| 141. | More extreme weather                                                                                                                                                                                                                                                                                          | Xtreme                                           | 2b |
| 142. | Rise of the sea level                                                                                                                                                                                                                                                                                         | SLR                                              | 2b |
| 143. | A critical point where the system or soil cannot recover or return to its original state - e.g. a lot of emissions, volcanic eruptions, massive ice melting due to hot summers                                                                                                                                | CTH ;<br>CTP_Irrevers ;<br>Cryos ;<br>CTP_Feedbk | 3  |
| 144. | Deforestation in the Amazon has gone so far that the forest is shrinking on its own due to dynamics in the climate system                                                                                                                                                                                     | CTP_Feedbk ;<br>Amzon ;<br>CTP_Irrevers          | 3  |
| 145. | Hey                                                                                                                                                                                                                                                                                                           |                                                  | 2a |
| 146. | When the glacier melts so that we get extra heating as a result of a lack of reflection from the sun. The fact that it is getting warmer due to greenhouse effects can get us over a threshold where it is difficult to lower the temperature even if emissions that cause the greenhouse effect are reversed | Cryos ;<br>CTP_Feedbk ;<br>CTH ; CTP<br>Irrevers | 3  |
| 147. | The 2-degree target                                                                                                                                                                                                                                                                                           | Temp                                             | 2b |
| 148. | The Gulf Stream breaks / disappears                                                                                                                                                                                                                                                                           | Ocean_circ                                       | 3  |
| 149. | war, terror                                                                                                                                                                                                                                                                                                   |                                                  | 2b |
| 150. | When we reach a certain temperature                                                                                                                                                                                                                                                                           | Temp                                             | 2b |

|      |                                                                                                                                                                                                                           |                            |    |
|------|---------------------------------------------------------------------------------------------------------------------------------------------------------------------------------------------------------------------------|----------------------------|----|
| 151. | Melting of permafrost                                                                                                                                                                                                     | Permfrost                  | 3  |
| 152. | The poles are melting and the water level is rising                                                                                                                                                                       | Cryos ; SLR                | 3  |
| 153. | Habitat destruction                                                                                                                                                                                                       | HDF                        | 2b |
| 154. | Oil extraction                                                                                                                                                                                                            |                            | 2b |
| 155. | If one has passed a tipping point, it is no longer possible to naturally return to the previous state. For example, excessive felling of a forest can lead to drying out so that the entire forest eventually disappears. | CTP_Irrevers ;<br>HDF      | 3  |
| 156. | C                                                                                                                                                                                                                         |                            | 2a |
| 157. | When the temperature rises past a certain point, it will be too late to reverse the changes that will occur because of it                                                                                                 | Temp ; CTP<br>Irrevers     | 3  |
| 158. | Changes in oceans and air currents                                                                                                                                                                                        | Ocean_circ ;<br>Atmos_circ | 3  |
| 159. | If the ice on Greenland or the South Pole melts, the sea level may rise                                                                                                                                                   | SLR; Greenland ;<br>Cryos  | 3  |
| 160. | The ice at the poles is melting                                                                                                                                                                                           | P_Cryos                    | 3  |
| 161. | Joggi                                                                                                                                                                                                                     |                            | 2a |

Table S7. Coded Features of Climate Tipping Points Identified by Participants

| <i>Rank</i> | <i>Characteristic</i>    | <i>Count</i> | <i>Share of Participants (N = 161) (%)</i> |
|-------------|--------------------------|--------------|--------------------------------------------|
| 1           | Limited Reversibility    | 46           | 28                                         |
| 2           | Feedbacks                | 18           | 11                                         |
| 3           | Critical Threshold       | 13           | 8                                          |
| 4           | Abruptness/non-linearity | 8            | 4                                          |
| 5           | Multiple stable states   | 4            | 2                                          |
